# Supplementary material for: A strategy for rapid structural characterization of saponins and flavonoids from the testa of Camellia oleifera Abel seeds by ultra-high-pressure liquid chromatography combined with electrospray ionization linear ion trap-orbitrap mass spectrometry
Source: Royal Society of Chemistry journal article supplement (doi:10.1039/c5ay00862j), 2015-01-01
Supplement: c5ay00862j1.pdf [file c5ay00862j1.pdf]

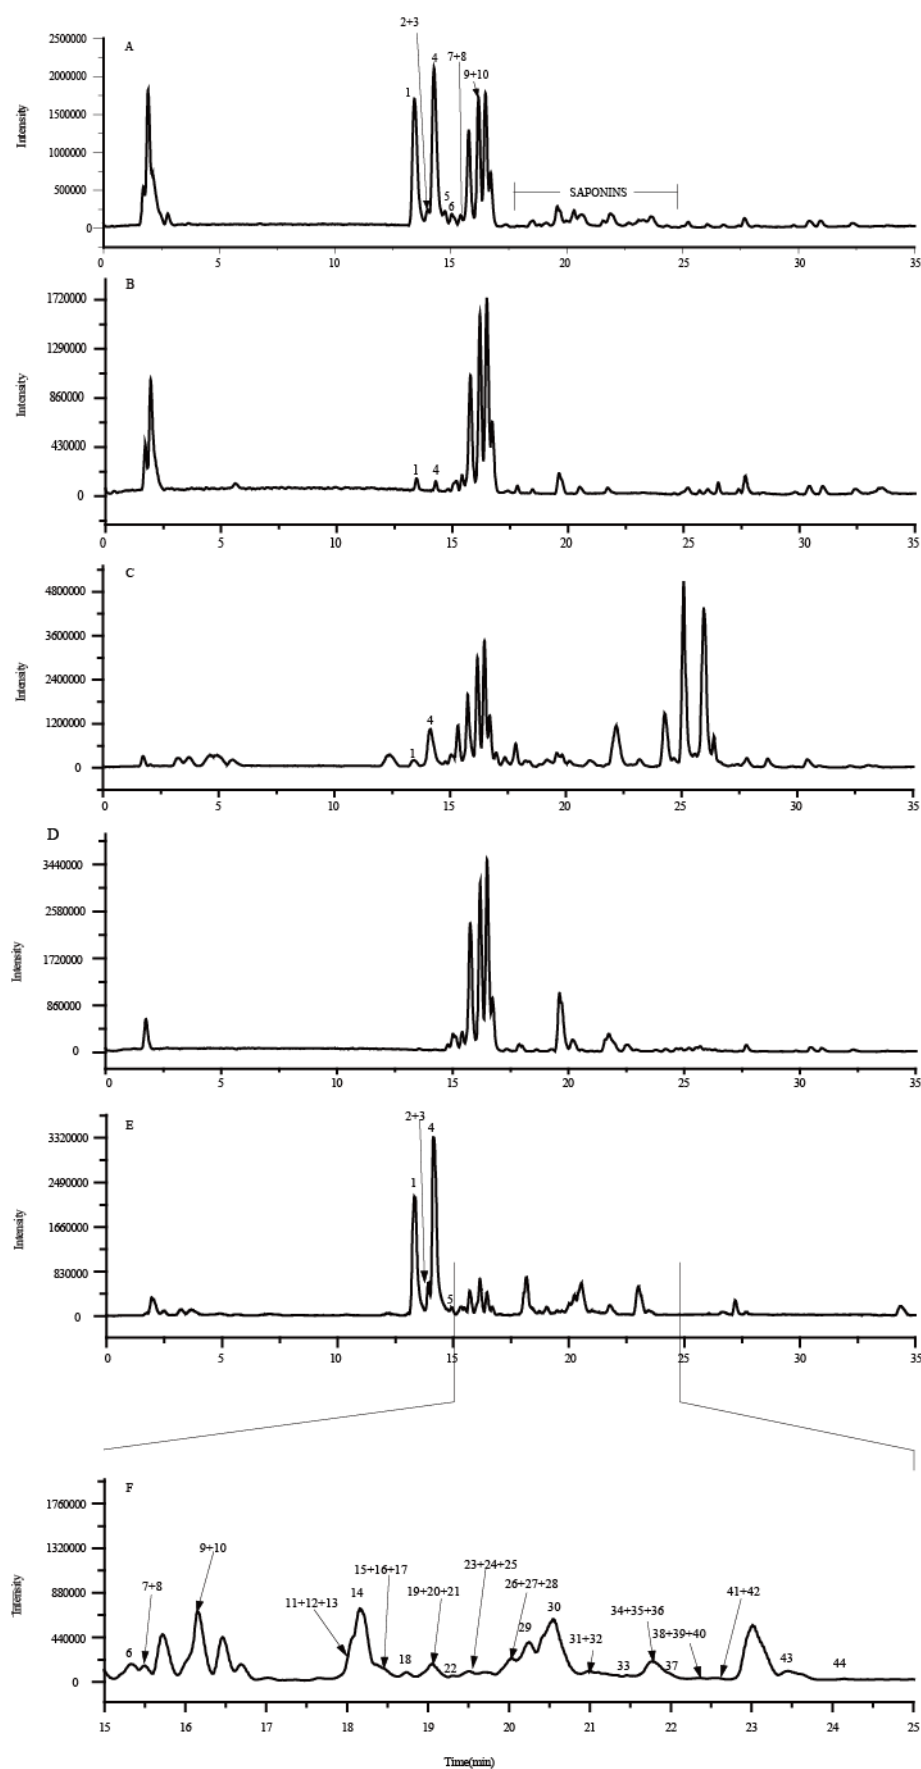

**Fig. S1** Base peak chromatograms of the following fractions: (A) hydro-alcoholic extracts; (B)

Aqueous fraction;(C) Ethyl acetate fraction; (D) Chloroform fraction; (E)Butanolic fraction; (F)

Partial enlarged drawing of butanolic fraction.

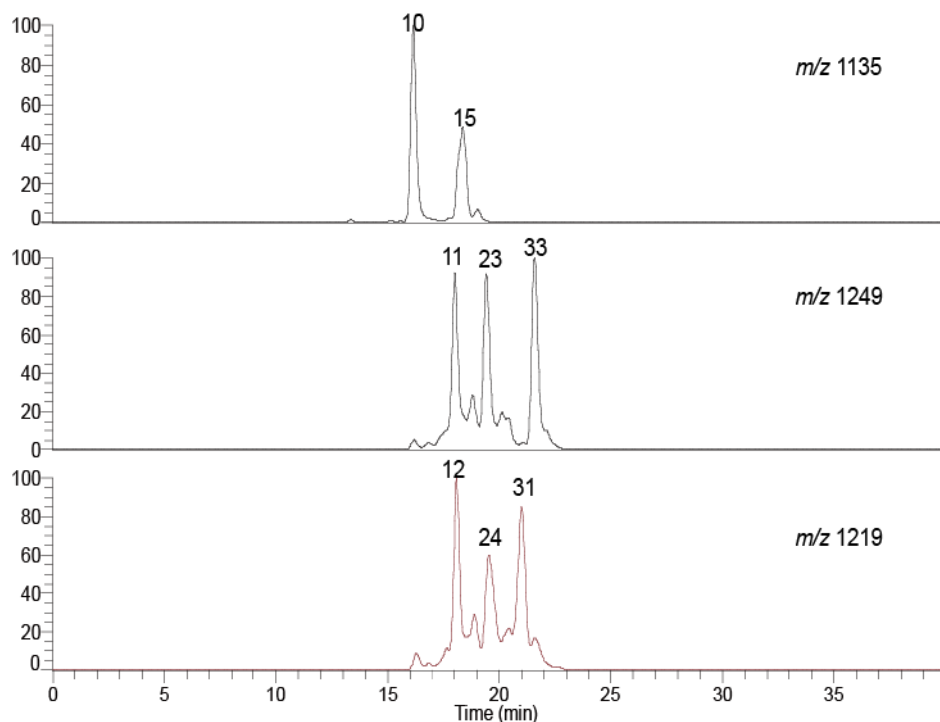

**Fig. S2** Extracted ion chromatograms of the ions at  $m/z$  1135, 1249 and 1219 respectively.

**Table S1** Accurate mass measurements for the product ion of  $[M-H]^-$  ion at  $m/z$  1203 for compound **29** by negative ion high-resolution ESI-MS<sup>2</sup>.

| Observed mass (Da) | Calculated mass (Da) | Error (ppm) | Formular             |
|--------------------|----------------------|-------------|----------------------|
| 1101.50989         | 1101.51123           | -1.22       | $C_{53}H_{81}O_{24}$ |
| 1071.53516         | 1071.53705           | -1.77       | $C_{53}H_{83}O_{22}$ |
| 1023.51300         | 1023.51592           | -2.85       | $C_{53}H_{83}O_{22}$ |
| 891.47260          | 891.47366            | -1.20       | $C_{47}H_{71}O_{16}$ |
| 667.41962          | 667.42045            | -1.24       | $C_{40}H_{59}O_8$    |
| 553.38806          | 553.38875            | -1.25       | $C_{35}H_{53}O_5$    |
| 451.10828          | 451.10823            | 0.10        | $C_{17}H_{23}O_{14}$ |

**Table S2** Accurate mass measurements for the product ion of  $m/z$  1071 ion from  $[M-H]^-$  ion at  $m/z$  1203 by negative ion high-resolution ESI-MS<sup>3</sup>.

| Observed mass (Da) | Calculated mass (Da) | Error (ppm) | Formular             |
|--------------------|----------------------|-------------|----------------------|
| 909.48248          | 909.48423            | -1.92       | $C_{47}H_{73}O_{17}$ |
| 891.47015          | 891.47366            | -3.94       | $C_{47}H_{71}O_{16}$ |

**Table S3** Accurate mass measurements for the product ion of  $m/z$  1023 ion from  $[M-H]^-$  ion at  $m/z$  1203 ion by negative ion high-resolution ESI-MS<sup>3</sup>.

| Observed mass (Da) | Calculated mass (Da) | Error (ppm) | Formular             |
|--------------------|----------------------|-------------|----------------------|
| 451.10822          | 451.10823            | -0.04       | $C_{17}H_{23}O_{14}$ |

**Table S4** Accurate mass measurements for the product ion of  $m/z$  891 ion from  $[M-H]^-$  ion at  $m/z$  1203 by negative ion high-resolution ESI-MS<sup>3</sup>

| Observed mass (Da) | Calculated mass (Da) | Error (ppm) | Formular                                       |
|--------------------|----------------------|-------------|------------------------------------------------|
| 553.38782          | 553.38875            | -1.69       | C <sub>35</sub> H <sub>53</sub> O <sub>5</sub> |
| 571.39825          | 571.39932            | -1.86       | C <sub>35</sub> H <sub>55</sub> O <sub>6</sub> |

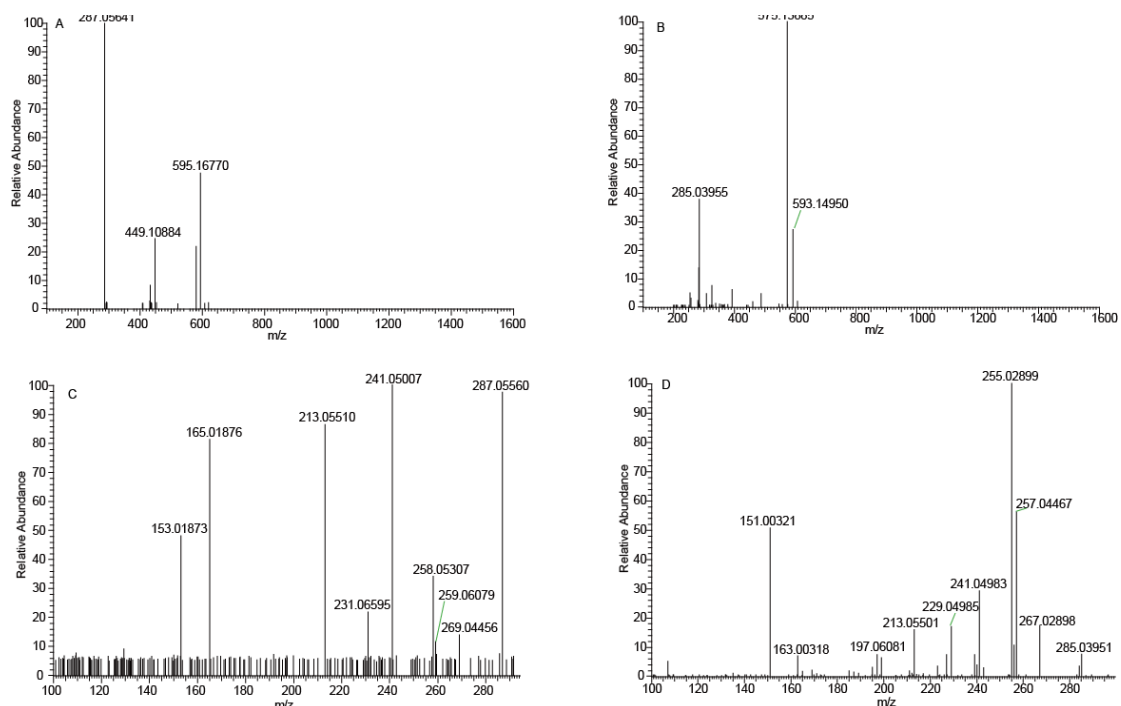

**Fig. S3** The MS<sup>2</sup> and MS<sup>3</sup> spectra of Camelliaside A (compound 1). (A) The positive MS<sup>2</sup> spectra (B) The negative MS<sup>2</sup> spectra (C) The positive MS<sup>3</sup> spectra (D) The negative MS<sup>3</sup> spectra

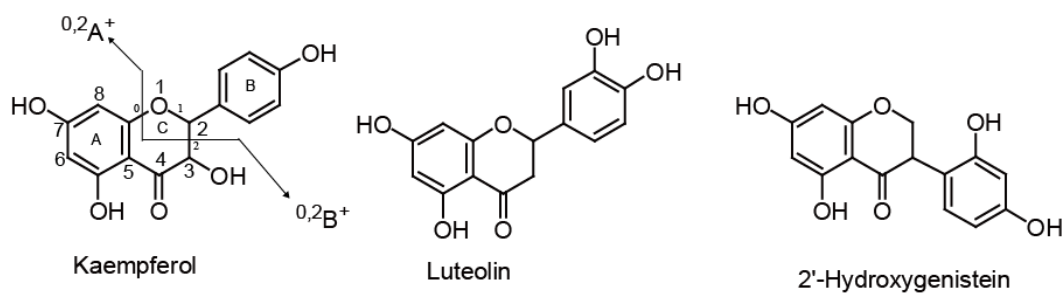

**Fig. S4.** Structures of kaempferol and its isomers.

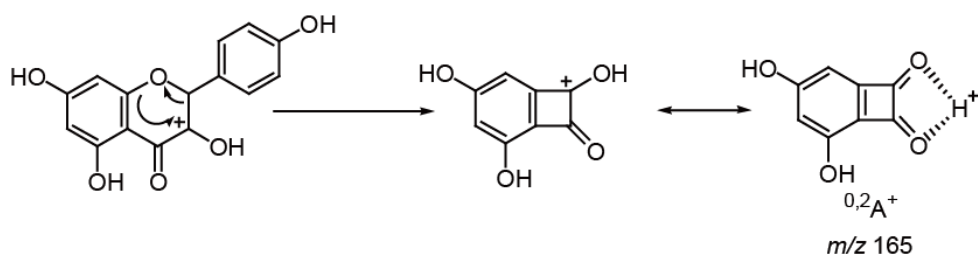

**Scheme S1.** Proposed mechanism for the formation of  $m/z$  165 ion.

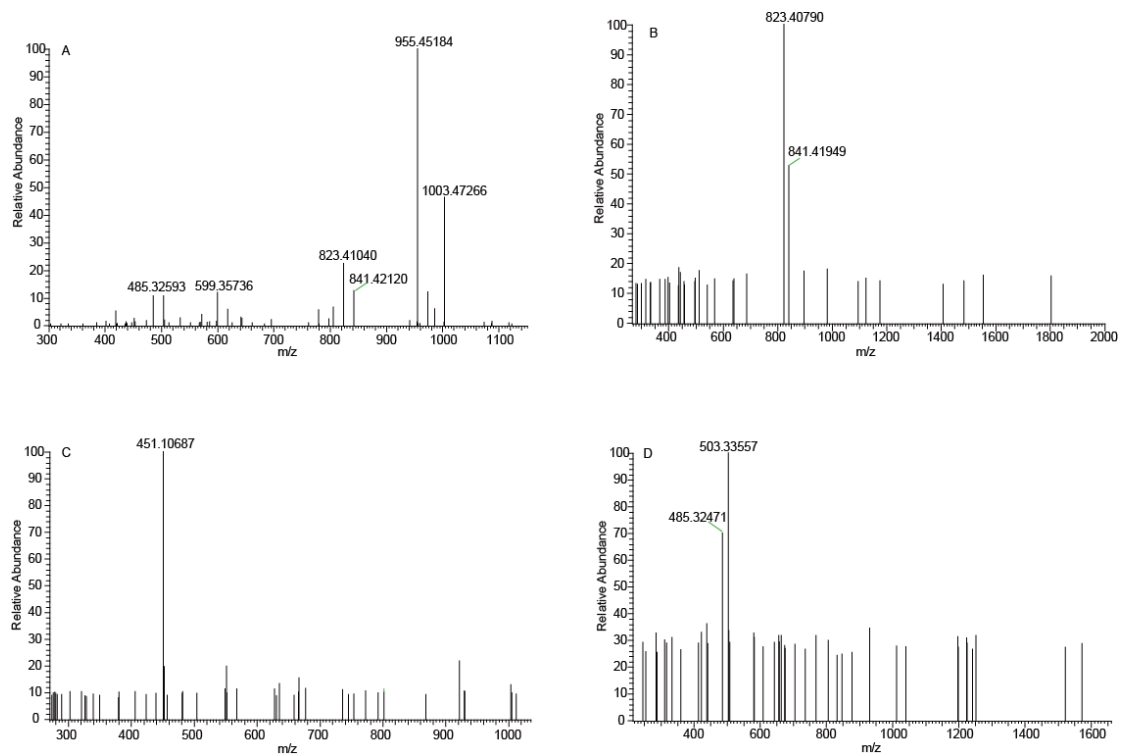

**Fig. S5** The  $MS^2$  and  $MS^3$  spectra of compound **10** in negative ion mode. (A) The  $MS^2$  spectra. (B) The product ion of  $m/z$  1003 ion. (C) The product ion of  $m/z$  955 ion. (D) The product ion of  $m/z$  823 ion.

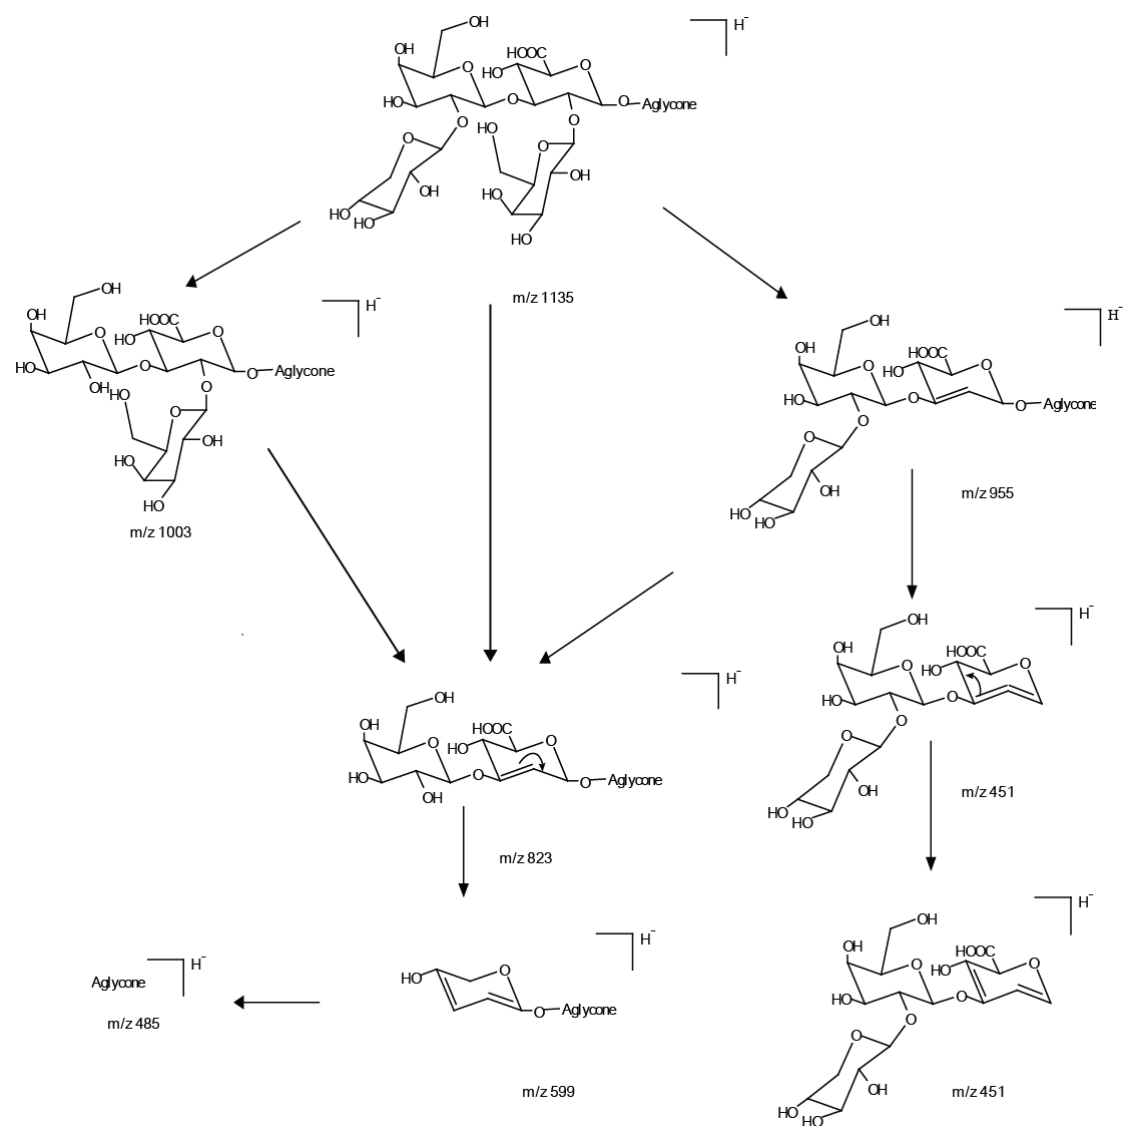

**Scheme S2** The proposal fragmentation pathway of compound 10.

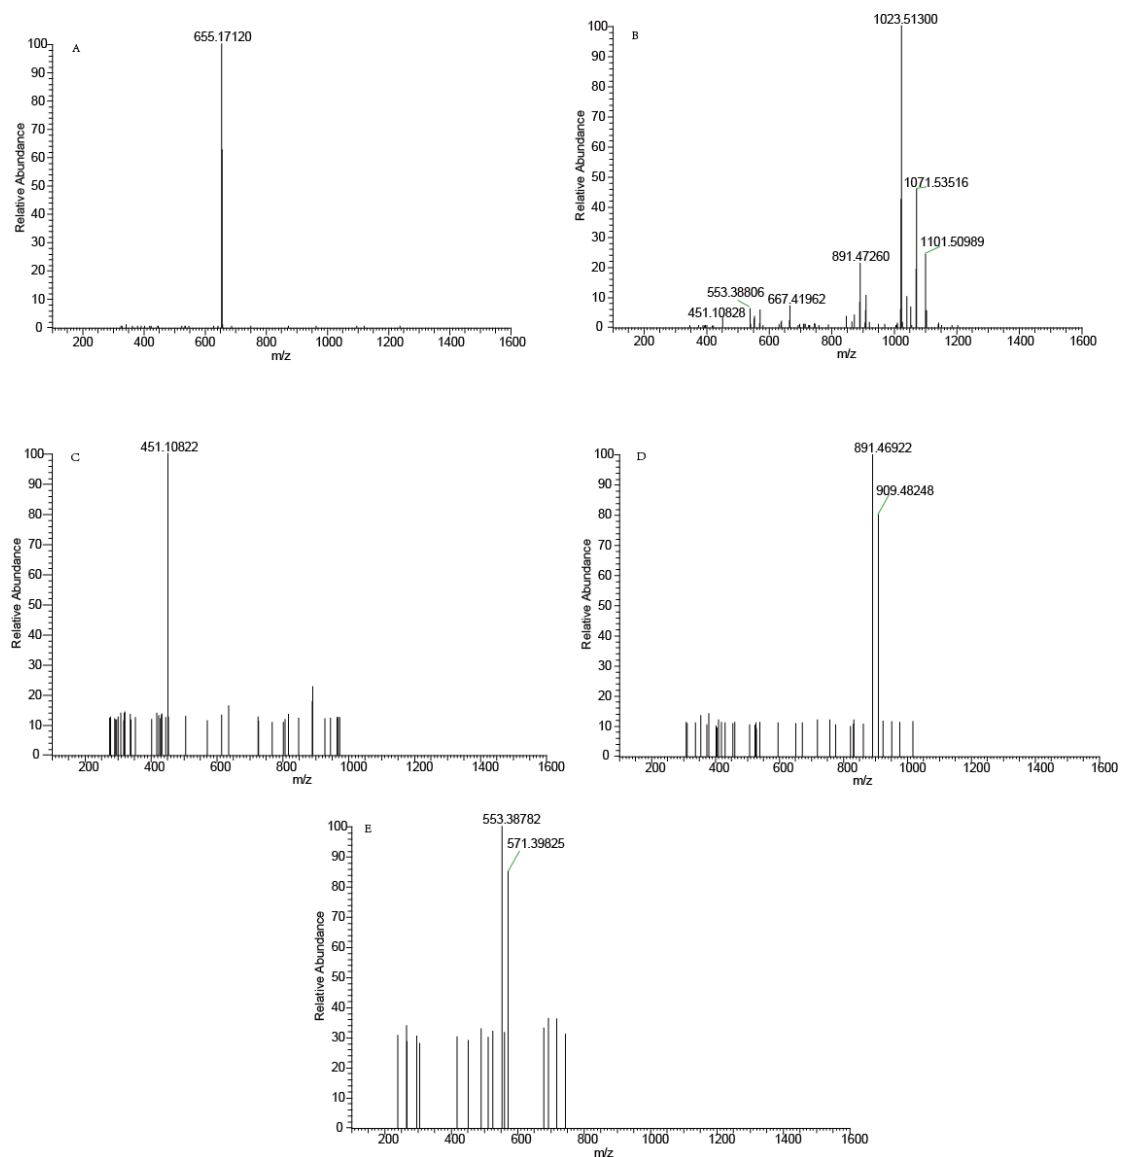

**Fig.S6** The  $MS^2$  and  $MS^3$  spectra of compound **29**. (A) The product ion of  $[M+Na]^+$  ion at  $m/z$  1227 in positive ion mode. (B) The  $MS^2$  spectra of  $m/z$  1203 ion in negative ion mode. (C) The product ion of  $m/z$  1023 ion in  $MS^3$  spectra. (D) The product ion of  $m/z$  1071 ion in  $MS^3$  spectra. (E) The product ion of  $m/z$  891 ion in  $MS^3$  spectra.
